# Supplementary material for: Zeolite cage-lock strategy for in situ synthesis of highly nitrogen-doped porous carbon for selective adsorption of carbon dioxide gas
Source: Royal Society of Chemistry journal article supplement (doi:10.1039/c6ra26997d), 2017-01-01
Supplement: c6ra26997d1.pdf [file c6ra26997d1.pdf]

## Supporting Information

### **Zeolite-cage-lock strategy for in-situ synthesizing highly nitrogen-doped porous carbon for selective adsorption of carbon dioxide gas**

*Chunfeng Xue*<sup>1\*</sup>, *Hongye Zhu*<sup>1</sup>, *Tingting Xu*<sup>1</sup>, *Enyang Wang*<sup>1</sup>, *Bo Xiao*<sup>2</sup>, *Xuguang Liu*<sup>1</sup>, *Xiaogang Hao*<sup>1\*</sup>, and *Guoqing Guan*<sup>3</sup>

<sup>1</sup> *College of Chemistry and Chemical Engineering, Taiyuan University of Technology, Taiyuan 030024, Shanxi, China. E-mail: cfxue@fudan.edu.cn*

<sup>2</sup> *School of Chemistry and Chemical Engineering, Queen's University Belfast, Belfast, BT7-1NN, Northern Ireland, UK.*

<sup>3</sup> *North Japan Research Institute for Sustainable Energy, Hirosaki University, Aomori, 030-0813, Japan*

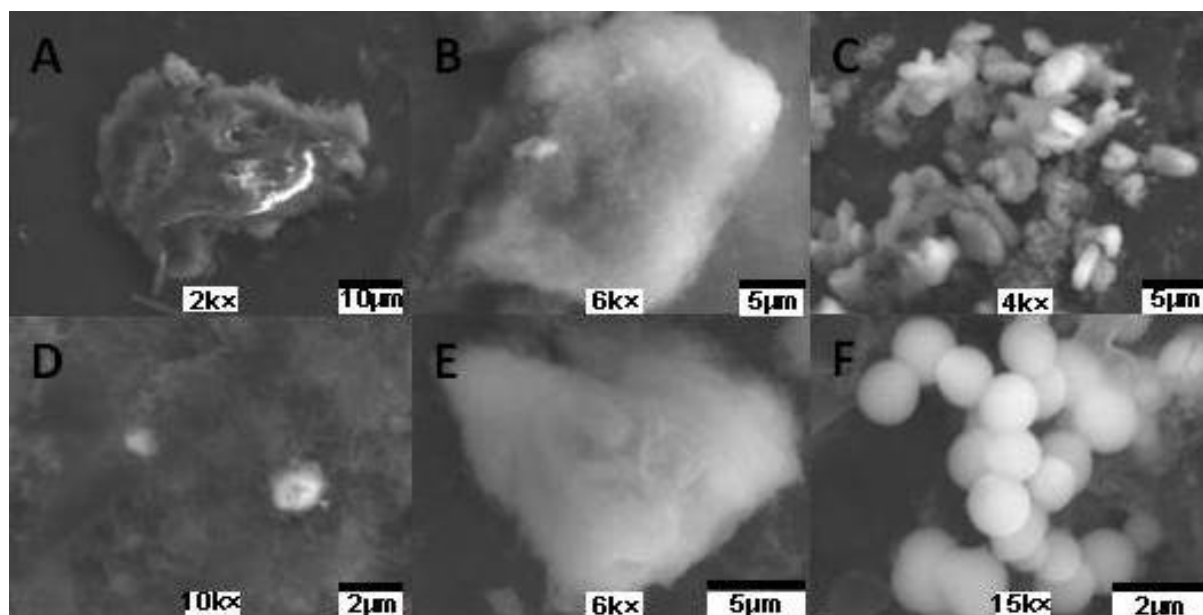

**Figure S1.** SEM images of samples: (A, D) NPC-723, (B, E) NPC-873, and (C, F)

NPC-1173

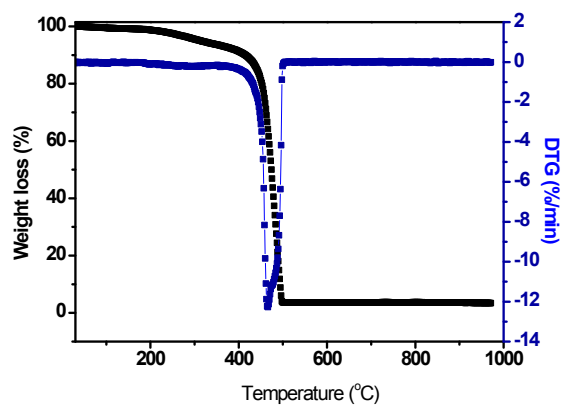

**Figure S2.** TG curve (black) and DTG curve (Royal blue) of sample NPC-873 recorded in air.

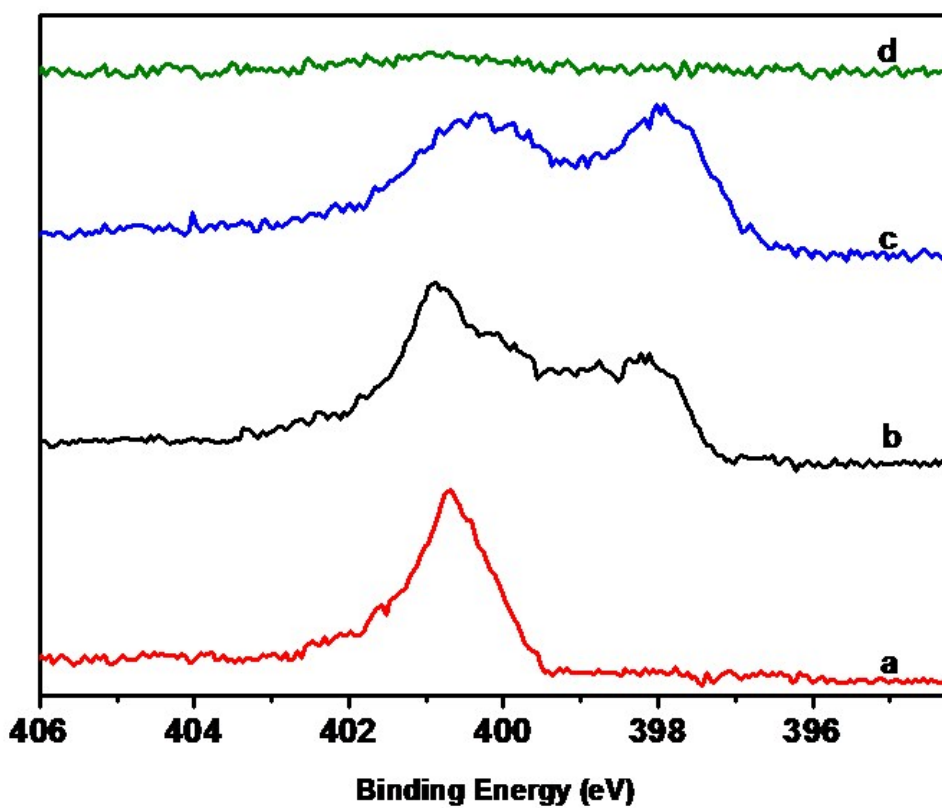

**Figure S3.** N1s Spectra of samples: (a) as-made zeolite ZSM-39, (b) NPC-723, (c) NPC-873, and (d) NPC-1173.
